# Supplementary material
Source: PubMed Central journal article supplement (PMC6170689)
Supplement: NIHMS980173-supplement-Supplemental_Data_File___doc___tif__pdf__etc___1.pdf [file NIHMS980173-supplement-Supplemental_Data_File___doc___tif__pdf__etc___1.pdf]

Form Date: \_\_\_ / \_\_\_ / \_\_\_\_\_

Study ID: \_\_\_ - \_\_\_ - \_\_\_\_\_ - \_\_\_\_\_

Entered: \_\_\_ / \_\_\_ / \_\_\_\_\_ Initials: \_\_\_ **For office use only.**

# ADAPT: CT Imaging (CTIMG)

Staff ID: \_\_\_ - \_\_\_ - \_\_\_\_\_

## Technical Information

**Radiologist:**  Ashok Panigraphy  Giulio Zuccoli

**CT Date:** \_\_\_ / \_\_\_ / \_\_\_\_\_ **CT Time:** \_\_\_ : \_\_\_ (please use 24 hour clock)

**Imaging Modality (choose one):**  Non-contrast CT  Contrast CT  CT Angiography

**Imaging scanner manufacturer name (choose one):**

- Agfa  Carestream  GE  Hitachi  Hologic  
 Konica Minolta  Philips  Siemens  Toshiba  
 Other, specify: \_\_\_\_\_

**Imaging sequence (choose all that apply):**

- GRE  MRSI  PWI  
 Other, specify: \_\_\_\_\_

**Results:**  Normal  Abnormal  Unknown If "Normal", skip remaining questions.

**Skull FX:**  Present  Absent  Indeterminate

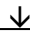

**Anatomic site (select one):**

- Anterior fossa  Frontal - L  Occipital - L  Parietal - L  Skull base - L  Temporal - L  
 Middle fossa  Frontal - R  Occipital - R  Parietal - R  Skull base - R  Temporal - R  
 Posterior fossa

**Findings related to morphology of the skull fracture (check all that apply):**

- Comminuted  Linear  Pneumocephalus  
 Compound  Other craniofacial fractures  Probable fracture  
 Depressed  Penetrating  
 Diastatic  Ping pong fracture

**Extra axial hematoma:**  Present  Absent  Indeterminate

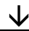

**Anatomic site (Check all that apply):**

- Left:**  Frontal  Occipital  Parietal  Posterior fossa  Temporal  Tentorial  
**Right:**  Frontal  Occipital  Parietal  Posterior fossa  Temporal  Suprasellar Tentorial  
 Interhemispheric supratentorial - Anterior (frontoparietal)  
 Interhemispheric supratentorial - Posterior (occip)

**Epidural hematoma (EDH):**  Present  Absent  Indeterminate

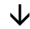

**Type of Hematoma (select one):**  Likely arterial  Likely venous

**Anatomic site (Check all that apply):**

- Left:**  Frontal  Occipital  Parietal  Posterior fossa  Temporal  
**Right:**  Frontal  Occipital  Parietal  Posterior fossa  Temporal

**Subdural hematoma (SDH):**  Present  Absent  Indeterminate

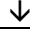

**Type of Hematoma (select one):**  Acute  Chronic  Lengthy  Prolonged  Subacute

**Anatomic site (Check all that apply):**

**Left:**  Frontal  Occipital  Parietal  Temporal  Tentorial  
 Posterior fossa – interhemispheric infratentorial

**Right:**  Frontal  Occipital  Parietal  Temporal  Tentorial  
 Posterior fossa – interhemispheric infratentorial

Interhemispheric supratentorial - Anterior (frontoparietal)  
 Interhemispheric supratentorial – Posterior (occip)

**Intracerebral hemorrhage (ICH):**  Present  Absent  Indeterminate

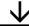

**Anatomic site (Check all that apply):**

**Left:**  Cerebellum  Frontal  Internal capsule  Medulla  Midbrain  Occipital  
 Parietal  Pons  Temporal  Thalamus/Basal ganglia

**Right:**  Cerebellum  Frontal  Internal capsule  Medulla  Midbrain  Occipital  
 Parietal  Pons  Temporal  Thalamus/Basal ganglia

**Intraventricular hemorrhage (IVH):**  Present  Absent  Indeterminate

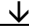

**Anatomic site (Check all that apply):**

Lateral ventricle – L  Third Ventricle  
 Lateral ventricle – R  Fourth Ventricle

**Subarachnoid hemorrhage (SAH):**  Present  Absent  Indeterminate

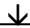

**Anatomic site (Check all that apply):**

**Left:**  Frontal  Occipital  Parietal  Posterior fossa  Temporal  Tentorial

**Right:**  Frontal  Occipital  Parietal  Posterior fossa  Temporal  Suprasellar Tentorial

Interhemispheric supratentorial - Anterior (frontoparietal)  
 Interhemispheric supratentorial – Posterior (occip)  
 Perimesencephalic

**Extent of hemorrhage:**  Mild  Moderate  Severe  Unknown

**Midline shift supratentorial:**  Present  Absent  Indeterminate

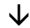

**Amount:**  < 1 cm  1-2 cm  > 2 cm  Unknown  
**Direction:**  R → L  L → R

**Cisternal compression:**  Present  Absent  Indeterminate

**Fourth ventricle shift or effacement:**  Present  Absent  Indeterminate

**Diffuse axonal injury:**  Present  Absent  Indeterminate

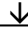

**Anatomic site (Check all that apply):**

**Left:**  Cerebellum  Frontal  Internal capsule  Medulla  Midbrain  Occipital  
 Parietal  Pons  Temporal  Thalamus/Basal ganglia  Brainstem  
 Corpus Callosum  Subcortical White matter  Cerebellar Peduncles

**Right:**  Cerebellum  Frontal  Internal capsule  Medulla  Midbrain  Occipital  
 Parietal  Pons  Temporal  Thalamus/Basal ganglia  Brainstem  
 Corpus Callosum  Subcortical White matter  Cerebellar Peduncles

**Select one:**  R > L  L > R  Equal

**Contusion:**  Present  Absent  Indeterminate

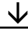

**Anatomic site (check all that apply):**

**Left:**  Cerebellum  Frontal  Internal capsule  Medulla  Midbrain  Occipital  
 Parietal  Pons  Temporal  Thalamus/Basal ganglia

**Right:**  Cerebellum  Frontal  Internal capsule  Medulla  Midbrain  Occipital  
 Parietal  Pons  Temporal  Thalamus/Basal ganglia

**Findings (check all that apply):**

Hemorrhagic  Non-hemorrhagic  
 Cortical  Subcortical  
 Deep brain structures  
 Probable brain laceration (linear hemorrhagic or non-hemorrhagic pattern, often associated with overlying skull fracture)

**Penetrating injury:**  Present  Absent  Indeterminate

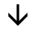

**Anatomic site (check all that apply):**

**Left:**  Cerebellum  Frontal  Internal capsule  Medulla  Midbrain  Occipital  
 Parietal  Pons  Temporal  Thalamus/Basal ganglia

**Right:**  Cerebellum  Frontal  Internal capsule  Medulla  Midbrain  Occipital  
 Parietal  Pons  Temporal  Thalamus/Basal ganglia

**Associated findings (check all that apply):**

In-driven fragments (bone, foreign bodies)  Transventricular trajectory  
 Through and through trajectory (entrance and exit sites)  Crosses midline

**Cervicomedullary junction or brainstem injury:**  Present  Absent  Indeterminate

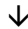

**Anatomic site (check all that apply):**

Midbrain  Pons  Medulla  Cervical

**Edema:**  Present  Absent  Indeterminate

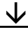

**Anatomic site (check all that apply):**

Brainstem

**Left:**  Cerebellum  Deep gray matter  Frontal  Occipital  Parietal  Temporal

**Right:**  Cerebellum  Deep gray matter  Frontal  Occipital  Parietal  Temporal

**Extent (check all that apply):**

Bihemispheric

Focal

Global

Hemispheric

Lobar

Multilobar

Posterior fossa

**Brain swelling:**  Present  Absent  Indeterminate

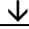

**Anatomic site (check all that apply):**

Brainstem

**Left:**  Cerebellum  Deep gray matter  Frontal  Occipital  Parietal  Temporal

**Right:**  Cerebellum  Deep gray matter  Frontal  Occipital  Parietal  Temporal

**Extent (check all that apply):**

Bihemispheric

Focal

Global

Hemispheric

Lobar

Multilobar

Posterior fossa

**Ischemia or infarction or hypoxic-ischemic injury:**  Present  Absent  Indeterminate

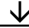

**Anatomic site (Check all that apply):**

Brainstem

**Left:**  Cerebellum  Deep gray matter  Frontal  Occipital  Parietal  Temporal

**Right:**  Cerebellum  Deep gray matter  Frontal  Occipital  Parietal  Temporal

**Extent (check all that apply):**

Bihemispheric

Focal

Global

Hemispheric

Lobar

Multilobar

Posterior fossa

**Brain atrophy or encephalomalacia:**  Present  Likely  Indeterminate  Absent

**Other findings?**  Yes  No  Unknown

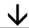

Specify other: \_\_\_\_\_

\_\_\_\_\_
